# Supplementary material
Source: Royal Society of Chemistry journal article supplement (doi:10.1039/d6ta01058j)
Supplement: d6ta01058j1.pdf [file d6ta01058j1.pdf]

## Supporting Information

### Effect of Electrochemical Etching parameters on the morphology and photocatalytic activity of porous 4H-SiC flakes

Vanessa Spanò<sup>†a</sup>, Matteo Barcellona<sup>†c</sup>, Angelo Ferlazzo<sup>a</sup>, Marcello Condorelli<sup>a</sup>, Luca Calantropo<sup>a</sup>, Roberto Fiorenza<sup>a</sup>, Salvatore Scirè<sup>a</sup>, Antonino Gulino<sup>b</sup>, Thomas Defforge<sup>c</sup>, Gaël Gautier<sup>c</sup> and Maria Elena Fragalà<sup>\*b</sup>

a University of Catania, Department of Chemical Sciences, Viale Andrea Doria, 6, 95125 - Catania (Italy)

b University of Catania and Instm Udr Catania, Department of Chemical Sciences, Viale Andrea Doria, 6, 95125 - Catania (Italy)

c GREMAN UMR-CNRS 7347, INSA Centre Val de Loire, Université de Tours, Tours, France

† Authors equally contributed.

\* Corresponding author email: me.fragala@unict.it

#### 1. Cross-section SEM images of Si-face flakes of all the Batches

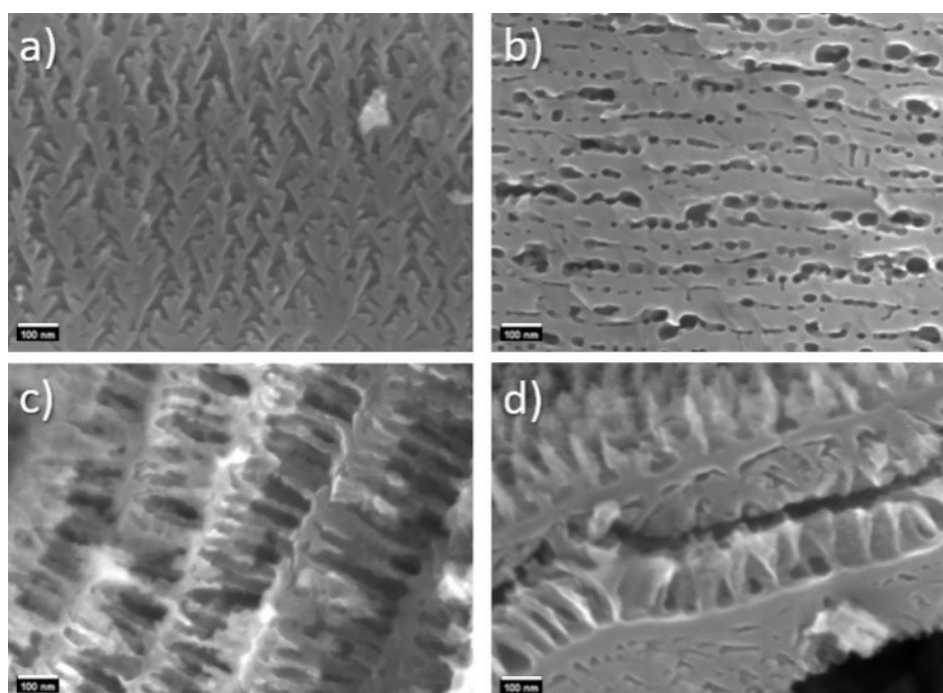

**Fig. S1** Comparison of all 4H-SiC porous flakes in cross-section-view SEM images of Si-face at the same magnification (150.000 x- scale bar 100 nm), in alphabetic order from Batch I to IV. The flakes are randomly dispersed on the SEM sample holder, so the orientation of the pores in the image is not representative of their direction of growth during ECE.

## 2. Cross-section SEM images of C-face flakes of all the Batches

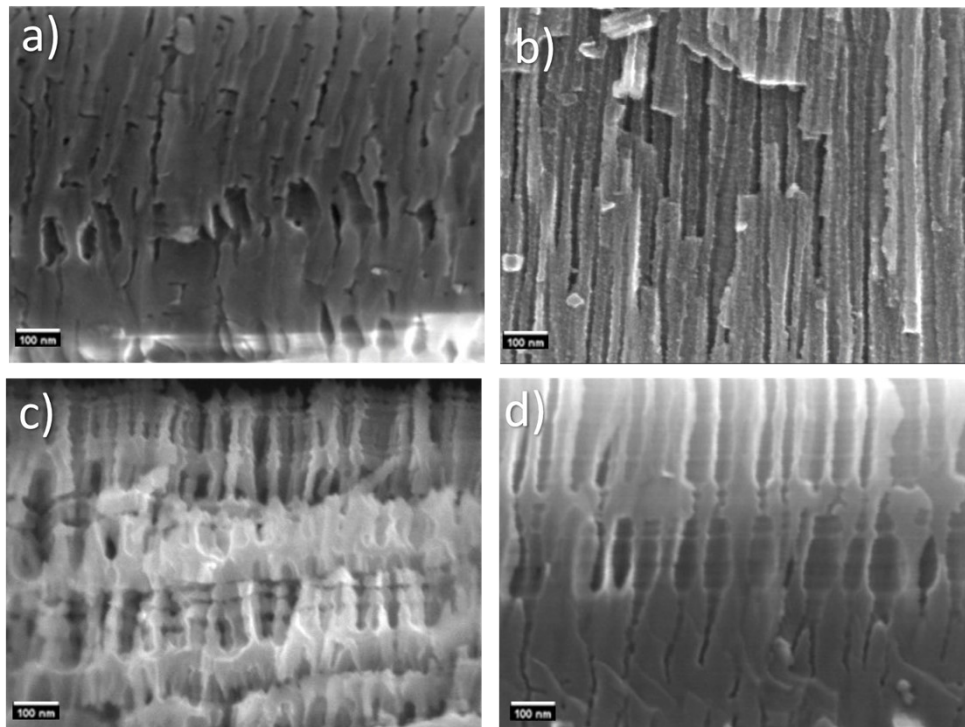

Fig. S2 Comparison of all 4H-SiC porous flakes in cross-section-view SEM analyses of C-face at the same magnification (150.000 x -scale bar 100 nm), in alphabetic order from Batch I to IV.

## 3. BJH pore size distribution curves of porous 4H-SiC Si-face and C-face flakes of Batch II

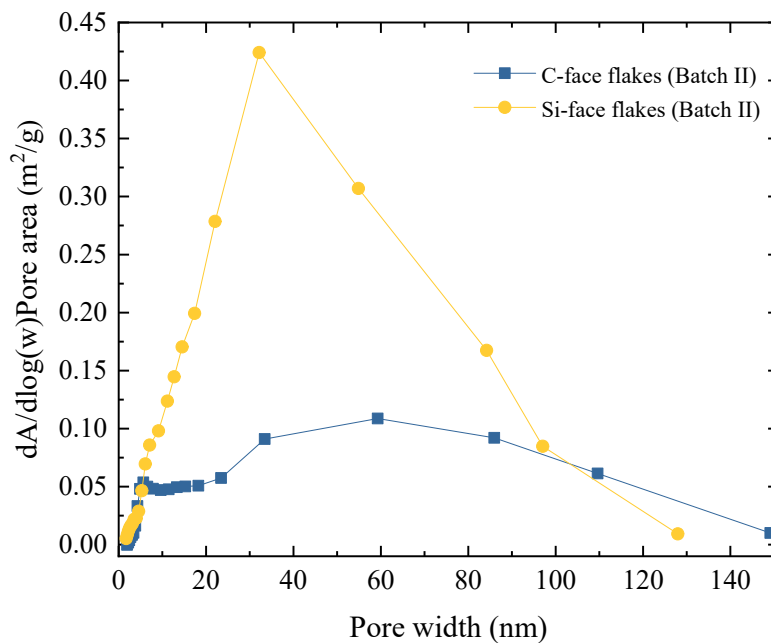

Fig. S3 BJH (desorption curve) pore size distribution of porous 4H-SiC flakes from the Si-face (yellow plot) and C-face (blue plot) of Batch II.

#### 4. BJH pore size distribution curves of porous 4H-SiC Si-face and C-face flakes of Batch III

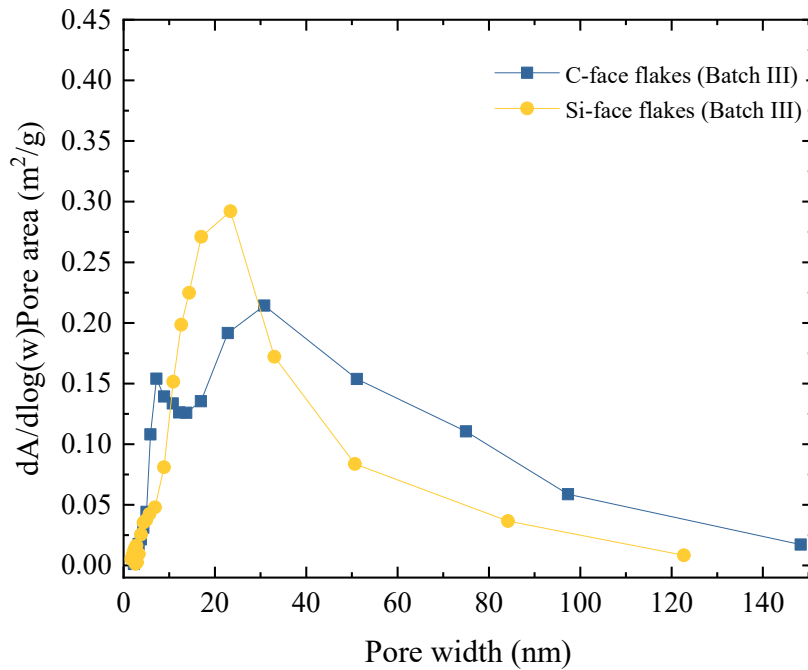

Fig. S4 BJH (desorption curve) pore size distribution of porous 4H-SiC flakes from the Si-face (yellow plot) and C-face (blue plot) of Batch III.

#### 5. BJH pore size distribution curves of porous 4H-SiC Si-face and C-face flakes of Batch IV

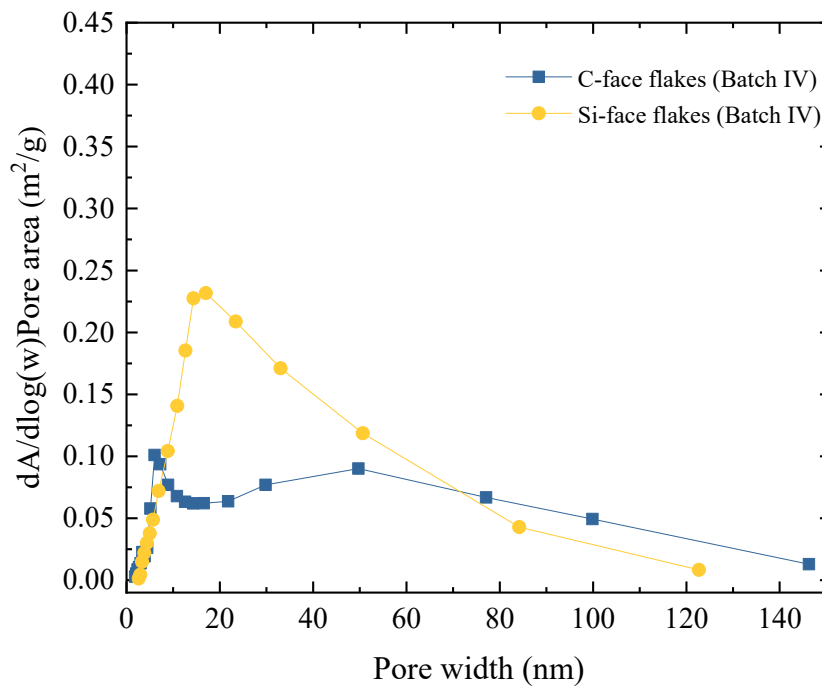

Fig. S5 BJH (desorption curve) pore size distribution of porous 4H-SiC flakes from the Si-face (yellow plot) and C-face (blue plot) of Batch IV.

## 6. Tauc plot of the Kubelka-Munk of all the Si- and C-face samples of all the batches

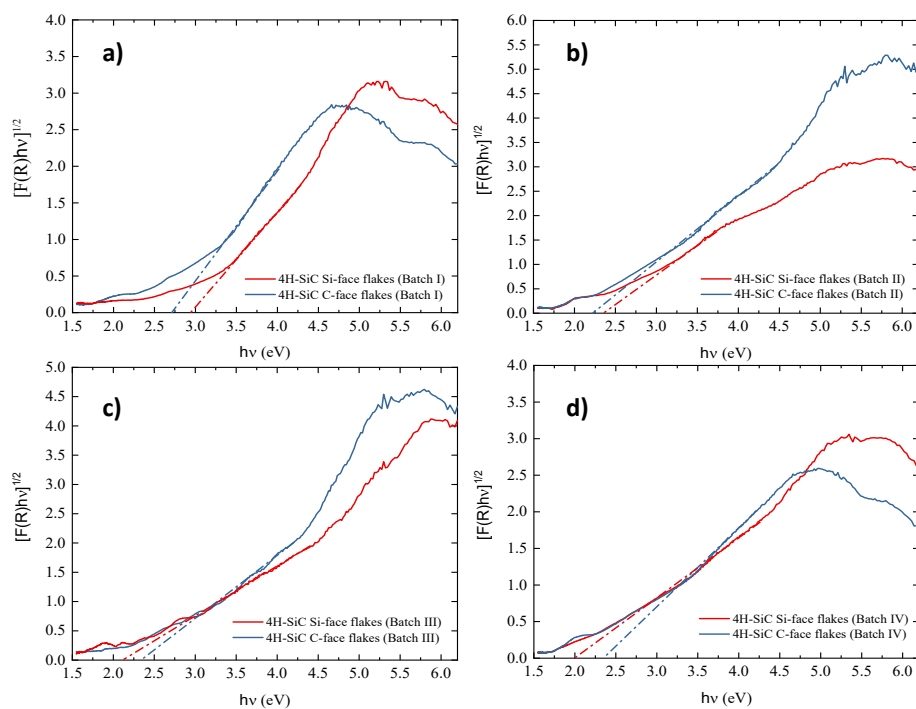

**Fig. S6** Tauc plot of the Kubelka-Munk function of the Si-face flakes (blue line) and the C-face flakes (red line) of all the flakes batches used to extrapolate bandgap value from linear-fitting.

## 7. XPS surface atomic composition percentages and C/Si-O/Si ratios

**Tab. S1** Surface atomic composition obtained from XPS analysis in the C 1s, Si 2p and O 1s regions for the C-face flakes of Batch I, II, and IV. The C/Si and O/Si ratios were calculated from the corresponding atomic percentages.

| Sample            | C 1s (%) | Si 2p (%) | O 1s (%) | C/Si | O/Si |
|-------------------|----------|-----------|----------|------|------|
| C-face (I batch)  | 48.2     | 38.5      | 13.3     | 1.25 | 0.35 |
| C-face (II batch) | 47.6     | 39.2      | 13.2     | 1.21 | 0.34 |
| C-face (IV batch) | 50.2     | 33.9      | 15.9     | 1.48 | 0.47 |
